# Supplementary material for: A Systematic Review and Meta-Analysis of the Association between Uric Acid and Allantoin and Rheumatoid Arthritis
Source: MDPI journal article supplement (doi:10.3390/antiox12081569), 2023-08-05
Supplement: s1 [file s1]

**Supplementary Table S3.** Cardiovascular risk factors in health controls and patients with rheumatoid arthritis.

| Study                                   | Healthy controls            |                                                                                             |                                                 | Patients with rheumatoid arthritis |                                                                                             |                                                 |
|-----------------------------------------|-----------------------------|---------------------------------------------------------------------------------------------|-------------------------------------------------|------------------------------------|---------------------------------------------------------------------------------------------|-------------------------------------------------|
|                                         | BMI<br>(kg/m <sup>2</sup> ) | Tot-Cholesterol<br>LDL-Cholesterol<br>HDL-Cholesterol<br>Triglycerides<br>(mg/dL or mmol/L) | Hypertension<br>Diabetes<br>Dyslipidemia<br>(%) | BMI<br>(kg/m <sup>2</sup> )        | Tot-Cholesterol<br>LDL-Cholesterol<br>HDL-Cholesterol<br>Triglycerides<br>(mg/dL or mmol/L) | Hypertension<br>Diabetes<br>Dyslipidemia<br>(%) |
| Grootveld et al, 1987, UK [1]           | NR                          | NR                                                                                          | NR                                              | NR                                 | NR                                                                                          | NR                                              |
| Yardim-Akaydin et al, 2004, Turkey [2]  | NR                          | NR                                                                                          | NR                                              | NR                                 | NR                                                                                          | NR                                              |
| Santos et al, 2010, Portugal [3]        | NR                          | 207<br>128<br>62<br>98                                                                      | 32<br>6.9<br>56                                 | NR                                 | 203<br>123<br>64<br>104                                                                     | 44<br>7.1<br>54                                 |
| Mishra et al, 2012, India [4]           | 23                          | 3.45<br>55<br>67<br>86                                                                      | NR                                              | 23                                 | 6.56<br>100<br>47<br>143                                                                    | NR                                              |
| Stamp et al, 2012, UK [5]               | NR                          | NR                                                                                          | NR                                              | NR                                 | NR                                                                                          | NR                                              |
| Turner et al, 2012, New Zealand [6]     | NR                          | NR                                                                                          | NR                                              | NR                                 | NR                                                                                          | NR                                              |
| Navarro-Compan et al, 2013, Spain [7]   | 26                          | NR<br>NR<br>57<br>NR                                                                        | NR                                              | 26.3                               | NR<br>NR<br>52<br>NR                                                                        | NR                                              |
| Bilecik et al, 2014, Turkey [8]         | 27.6                        | NR<br>NR<br>48<br>129                                                                       | NR                                              | 29                                 | NR<br>NR<br>51<br>121                                                                       | NR                                              |
| Chavan et al, 2015, India [9]           | NR                          | 196<br>126<br>42<br>137                                                                     | NR                                              | NR                                 | 213<br>151<br>31<br>147                                                                     | NR                                              |
| Costa et al, 2018, Brazil [10]          | 26.2                        | NR                                                                                          | NR                                              | 27.9                               | NR                                                                                          | NR                                              |
| Liu et al, 2018, China [11] (a)         | 23.2                        | 4.45<br>2.37<br>1.50<br>1.12                                                                | NR<br>NR<br>NR                                  | 24.6                               | 4.56<br>2.71<br>1.24<br>1.80                                                                | 36.5<br>100<br>28                               |
| Liu et al, 2018, China [11] (b)         | 23.2                        | 4.45<br>2.37<br>1.50<br>1.12                                                                | NR                                              | 23.2                               | 4.57<br>2.71<br>1.30<br>1.12                                                                | NR                                              |
| Al-Hakeim et al, 2019, Iraq [12]        | 26.3                        | NR                                                                                          | NR                                              | 25.8                               | NR                                                                                          | NR                                              |
| Contreras-Haro et al, 2019, Mexico [13] | 29.5                        | 201<br>116<br>48<br>NR                                                                      | 8<br>NR<br>NR                                   | 28                                 | 197<br>115<br>52<br>NR                                                                      | 33.7<br>NR<br>NR                                |
| Prescha et al, 2019, Poland [14]        | NR                          | NR                                                                                          | NR                                              | NR                                 | NR                                                                                          | NR                                              |
| Hu et al, 2020, China [15]              | 22.5                        | NR                                                                                          | NR<br>NR<br>NR                                  | 21.9                               | NR                                                                                          | 24.9<br>11.9<br>16.7                            |
| Lee et al, 2020, South Korea [16]       | 23.1                        | NR                                                                                          | --                                              | 22.7                               | NR                                                                                          | NR                                              |
| Patel et al, 2020, India [17]           | 23.6                        | NR                                                                                          | --                                              | 29.1                               | NR                                                                                          | NR                                              |
| Hu et al, 2021, China [18]              | 22.8                        | NR                                                                                          | 37.9<br>17.7<br>29.3                            | 22.1                               | NR                                                                                          | 19<br>11.6<br>13.8                              |
| Wang et al, 2022, China [19]            | NR                          | NR                                                                                          | NR                                              | NR                                 | NR                                                                                          | NR                                              |

Legend: BMI, body mass index; HDL, high-density lipoprotein; LDL, low-density lipoprotein; NR, not reported.



## References

1. Grootveld, M.; Halliwell, B. Measurement of allantoin and uric acid in human body fluids. A potential index of free-radical reactions in vivo? *Biochem J* **1987**, *243*, 803-808, doi:10.1042/bj2430803.
2. Yardim-Akaydin, S.; Sepici, A.; Ozkan, Y.; Torun, M.; Simsek, B.; Sepici, V. Oxidation of uric acid in rheumatoid arthritis: is allantoin a marker of oxidative stress? *Free Radic Res* **2004**, *38*, 623-628, doi:10.1080/10715760410001694044.
3. Santos, M.J.; Vinagre, F.; Silva, J.J.; Gil, V.; Fonseca, J.E. Cardiovascular risk profile in systemic lupus erythematosus and rheumatoid arthritis: a comparative study of female patients. *Acta Reumatol Port* **2010**, *35*, 325-332.
4. Mishra, R.; Singh, A.; Chandra, V.; Negi, M.P.; Tripathy, B.C.; Prakash, J.; Gupta, V. A comparative analysis of serological parameters and oxidative stress in osteoarthritis and rheumatoid arthritis. *Rheumatol Int* **2012**, *32*, 2377-2382, doi:10.1007/s00296-011-1964-1.
5. Stamp, L.K.; Khalilova, I.; Tarr, J.M.; Senthilmohan, R.; Turner, R.; Haigh, R.C.; Winyard, P.G.; Kettle, A.J. Myeloperoxidase and oxidative stress in rheumatoid arthritis. *Rheumatology (Oxford)* **2012**, *51*, 1796-1803, doi:10.1093/rheumatology/kes193.
6. Turner, R.; Stamp, L.K.; Kettle, A.J. Detection of allantoin in clinical samples using hydrophilic liquid chromatography with stable isotope dilution negative ion tandem mass spectrometry. *J Chromatogr B Analyt Technol Biomed Life Sci* **2012**, *891-892*, 85-89, doi:10.1016/j.jchromb.2012.02.009.
7. Navarro-Compan, V.; Melguizo-Madrid, E.; Hernandez-Cruz, B.; Santos-Rey, K.; Leyva-Prado, C.; Gonzalez-Martin, C.; Navarro-Sarabia, F.; Gonzalez-Rodriguez, C. Interaction between oxidative stress and smoking is associated with an increased risk of rheumatoid arthritis: a case-control study. *Rheumatology (Oxford)* **2013**, *52*, 487-493, doi:10.1093/rheumatology/kes286.
8. Bilecik, N.A.; Tuna, S.; Samanci, N.; Balci, N.; Akbas, H. Prevalence of metabolic syndrome in women with rheumatoid arthritis and effective factors. *Int J Clin Exp Med* **2014**, *7*, 2258-2265.
9. Chavan, V.U.; Ramavataram, D.; Patel, P.A.; Rupani, M.P. Evaluation of serum magnesium, lipid profile and various biochemical parameters as risk factors of cardiovascular diseases in patients with rheumatoid arthritis. *J Clin Diagn Res* **2015**, *9*, BC01-05, doi:10.7860/JCDR/2015/12206.5740.
10. Costa, N.T.; Scavuzzi, B.M.; Iriyoda, T.M.V.; Lozovoy, M.A.B.; Alfieri, D.F.; de Medeiros, F.A.; de Sa, M.C.; Micheletti, P.L.; Sekiguchi, B.A.; Reiche, E.M.V.; et al. Metabolic syndrome and the decreased levels of uric acid by leflunomide favor redox imbalance in patients with rheumatoid arthritis. *Clin Exp Med* **2018**, *18*, 363-372, doi:10.1007/s10238-018-0500-y.
11. Liu, X.Z.; Gao, Y.; Fan, J.; Xu, X.; Zhang, J.; Gao, J.; Wan, W.; Zhao, D.B. Metabolic abnormalities in rheumatoid arthritis patients with comorbid diabetes mellitus. *Clin Rheumatol* **2018**, *37*, 219-226, doi:10.1007/s10067-017-3847-7.
12. Al-Hakeim, H.K.; Moustafa, S.R.; Jasem, K.M. Serum Cesium, Rhenium, and Rubidium in Rheumatoid Arthritis Patients. *Biol Trace Elem Res* **2019**, *189*, 379-386, doi:10.1007/s12011-018-1497-5.
13. Contreras-Haro, B.; Hernandez-Gonzalez, S.O.; Gonzalez-Lopez, L.; Espinel-Bermudez, M.C.; Garcia-Benavides, L.; Perez-Guerrero, E.; Vazquez-Villegas, M.L.; Robles-Cervantes, J.A.; Salazar-Paramo, M.; Hernandez-Corona, D.M.; et al. Fasting triglycerides and glucose index: a useful screening test for assessing insulin resistance in patients diagnosed with rheumatoid arthritis and systemic lupus erythematosus. *Diabetol Metab Syndr* **2019**, *11*, 95, doi:10.1186/s13098-019-0495-x.
14. Prescha, A.; Zablocka-Slowinska, K.; Placzowska, S.; Gorczyca, D.; Luczak, A.; Grajeta, H. Silicon intake and plasma level and their relationships with systemic redox and inflammatory markers in rheumatoid arthritis patients. *Adv Clin Exp Med* **2019**, *28*, 1485-1494, doi:10.17219/acem/105380.

15. Hu, Z.; Xu, S.; Lin, H.; Ni, W.; Yang, Q.; Qi, J.; Du, K.; Gu, J.; Lin, Z. Prevalence and risk factors for bone loss in Southern Chinese with rheumatic diseases. *BMC Musculoskelet Disord* **2020**, *21*, 416, doi:10.1186/s12891-020-03403-1.
16. Lee, H.N.; Kim, A.; Kim, Y.; Kim, G.T.; Sohn, D.H.; Lee, S.G. Higher serum uric acid levels are associated with reduced risk of hip osteoporosis in postmenopausal women with rheumatoid arthritis. *Medicine (Baltimore)* **2020**, *99*, e20633, doi:10.1097/MD.00000000000020633.
17. Patel, S.L.; Prakash, J.; Gupta, V. TGF-beta1 +869C/T polymorphism increases susceptibility to rheumatoid arthritis in North Indian population. *Clin Rheumatol* **2020**, *39*, 2881-2888, doi:10.1007/s10067-020-05064-w.
18. Hu, Z.; Zhang, L.; Lin, Z.; Zhao, C.; Xu, S.; Lin, H.; Zhang, J.; Li, W.; Chu, Y. Prevalence and risk factors for bone loss in rheumatoid arthritis patients from South China: modeled by three methods. *BMC Musculoskelet Disord* **2021**, *22*, 534, doi:10.1186/s12891-021-04403-5.
19. Wang, Z.; Wang, W.; Xiang, T.; Gong, B.; Xie, J. Serum Uric Acid as a Diagnostic Biomarker for Rheumatoid Arthritis-Associated Interstitial Lung Disease. *Inflammation* **2022**, *45*, 1800-1814, doi:10.1007/s10753-022-01661-w.
